# Supplementary material
Source: publisher figshare collection journal article supplement (https://gsajournals.figshare.com/articles/dataset/_/14945463)
Supplement: Supplementary file 1 [file 1]

A

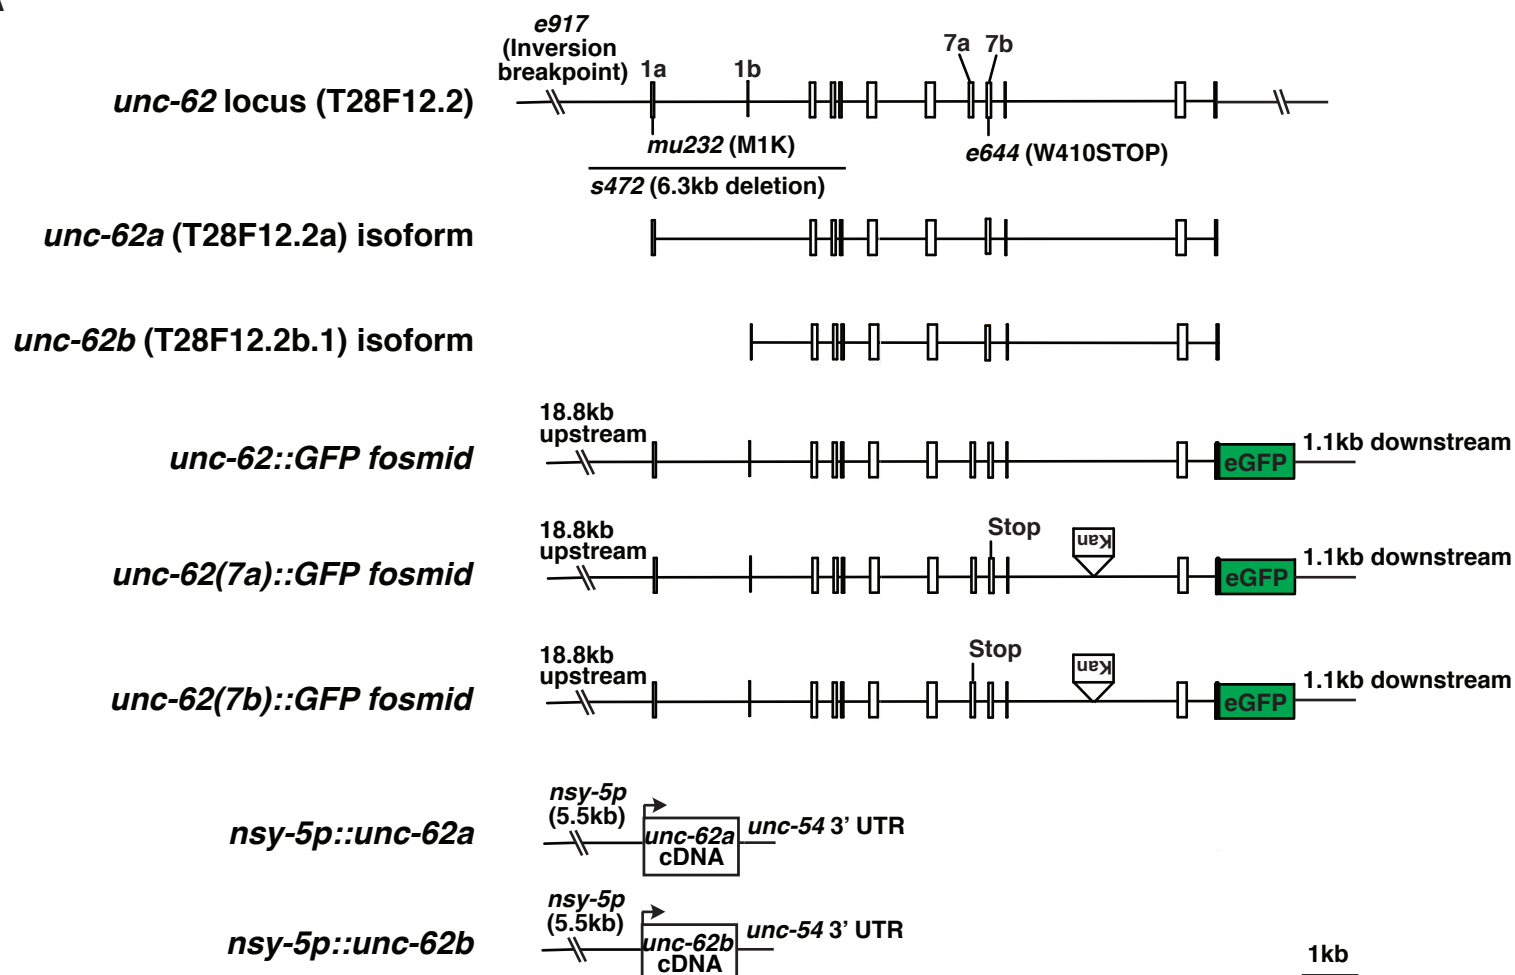

B

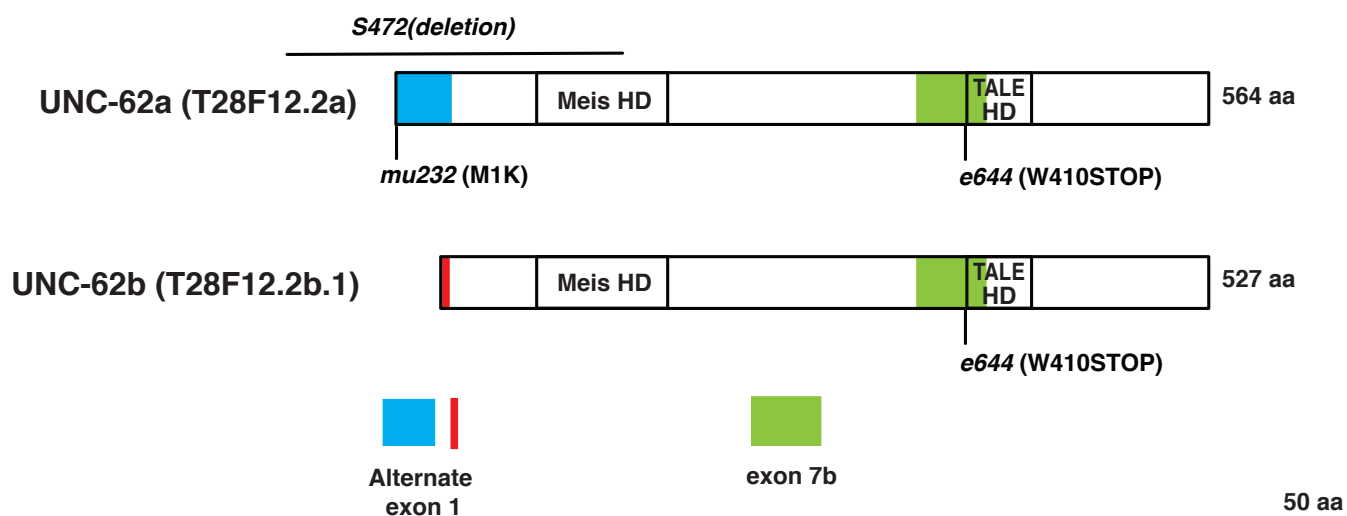

**Figure S2. Structure of *unc-62* gene and UNC-62 protein.**

(A) Structure of *unc-62* locus, splice variants, T28F12.2a and T28F12.2b.1, and transgenes.

(B) Domain structure of UNC-62 protein. HD, homeodomain.
