# Supplementary material
Source: publisher figshare collection journal article supplement (https://gsajournals.figshare.com/articles/dataset/_/14945463)
Supplement: Supplementary file 3 [file 1]

## Supplemental Materials and Methods

### Strains and transgenes

#### Mutants

*unc-36(e251)* III (Brenner 1974)

*unc-43(n1186lf)* IV (Troemel et al. 1999)

*unc-62(s472)* (Van Auken et al. 2002)

*unc-62(e644)* V (Brenner 1974)

*unc-62(e917)* V (Van Auken et al. 2002)

*unc-62(mu232)* V (Yang et al. 2005)

*ceh-36(ky640)* X (Lanjuin et al. 2003)

*mls-2(cc615)* X (Jiang et al. 2005)

*mls-2(ns156)* X (Yoshimura et al. 2008)

*mls-2(ns158)* X (Yoshimura et al. 2008)

*mls-2(tm252)* X (Consortium 2012)

#### Integrated transgenes

| Integrated transgenes                                                                   | Figures |
|-----------------------------------------------------------------------------------------|---------|
| <i>vyIs56 [odr-1p::TagRFP]</i> III (Alqadah et al. 2016)                                | 1, 4    |
| <i>oyIs44 [odr-1p::DsRed; lin-15(+)]</i> V (Lanjuin et al. 2003)                        | 1, 4    |
| <i>otIs185 [ceh-36p::GFP::cog-1 3'; rol-6(su1006)]</i> (Sarin et al. 2007)              | 1       |
| <i>wgIs600 [unc-62::GFP fosmid (WRM061dC01); unc-119(+)]</i> (Van Nostrand et al. 2013) | 1, 2    |
| <i>galIs285 [unc-62(7a)::GFP fosmid; unc-119(+)]</i> (Van Nostrand et al. 2013)         | 1, 2    |

|                                                                                          |          |
|------------------------------------------------------------------------------------------|----------|
| <i>galIs286</i> [ <i>unc-62(7b)::GFP fosmid; unc-119(+)</i> ] (Van Nostrand et al. 2013) | 1, 2     |
| <i>vyIs68</i> [ <i>str-2p::TagRFP; srsx-3p::GFP</i> ] III (Cochella et al. 2014)         | 2        |
| <i>kyIs140</i> [ <i>str-2p::GFP; lin-15(+)</i> ] I (Troemel et al. 1999)                 | 2, 3, S3 |
| <i>kyIs136</i> [ <i>str-2p::GFP; lin-15(+)</i> ] X (Troemel et al. 1999)                 | 2        |

### Extrachromosomal arrays

| Extrachromosomal arrays                                                                                                                                 | Figures     |
|---------------------------------------------------------------------------------------------------------------------------------------------------------|-------------|
| <i>vyEx574</i> [ <i>mls-2p::mls-2</i> (10 ng); <i>ofm-1p::DsRed</i> (30 ng/μl)]                                                                         | 1, 2        |
| <i>vyEx751, 747</i> [ <i>nsy-5p::mls-2</i> (10 ng/μl); <i>ofm-1p::DsRed</i> (30 ng/μl)]                                                                 | 1, 2, 4, S3 |
| <i>vyEx1308</i> [ <i>nsy-5p::unc62a</i> (10 ng); <i>ofm-1p::DsRed</i> (30 ng/μl)]                                                                       | 1           |
| <i>vyEx1284, 1310</i> [ <i>nsy-5p::unc62a</i> (10 ng); <i>odr-1p::DsRed</i> (15 ng/μl); <i>ofm-1p::DsRed</i> (30 ng/μl)]                                | 2           |
| <i>vyEx 1299, 1300, 1302</i> [ <i>nsy-5p::unc-62b</i> (10 ng/μl); <i>ofm-1p::DsRed</i> (30 ng/μl)]                                                      | 1, 2        |
| <i>vyEx 1431, 1490</i> [ <i>nsy-5p::unc-62b</i> (10 ng/μl); <i>odr-1p::DsRed</i> (15 ng/μl); <i>ofm-1p::DsRed</i> (30 ng/μl)]                           | 2, 3        |
| <i>vyEx1451, 1452, 1453</i> [ <i>ceh-36p::ceh-36</i> (Lanjuin et al. 2003) (2 ng/μl); <i>odr-1p::DsRed</i> (15 ng/μl); <i>ofm-1p::DsRed</i> (30 ng/μl)] | 3           |
| <i>vyEx1421, 1424</i> [ <i>mls-2p::mls-2</i> (10 ng/μl); <i>odr-1p::DsRed</i> (15 ng/μl); <i>ofm-1p::DsRed</i> (30 ng/μl)]                              | 3           |
| <i>vyEx1427</i> [ <i>nsy-5p::mls-2</i> (10 ng/μl); <i>odr-1p::DsRed</i> (15 ng/μl); <i>ofm-1p::DsRed</i> (30 ng/μl)]                                    | 3           |

|                                                                                                           |    |
|-----------------------------------------------------------------------------------------------------------|----|
| <i>kyEx1127</i> [ <i>odr-3::nsy-4</i> (72 ng/μl); <i>myo-3p::DsRed</i> (5 ng/μl)] (Chuang et al. 2007)    | S3 |
| <i>kyEx996</i> [ <i>nsy-5(genomic)</i> ; <i>odr-1p::DsRed</i> ; <i>ofm-1p::GFP</i> ] (Chuang et al. 2007) | S3 |

## Plasmid construction

### *mls-2p::mls-2*

A 4773 bp fragment of *mls-2g::mls-2* 3' UTR was digested from *hsp-2p::mls-2g::mls-2* 3' UTR (Jiang et al. 2005) and subcloned into a vector containing 5.5 kb of *mls-2* promoter (Jiang et al. 2005).

### *nsy-5p::mls-2*

A 4705 bp fragment of *mls-2g::mls-2* 3' UTR was digested from *hsp-2p::mls-2g::mls-2* 3' UTR (Jiang et al. 2005) and subcloned into a vector containing 5556 bp of *nsy-5* promoter (Chuang et al. 2007).

### *nsy-5p::unc-62a*

A 1721 bp of *unc-62a* isoform coding region was amplified from worm cDNA using PCR and subcloned into a vector containing 5556 bp of *nsy-5* promoter (Chuang et al. 2007).

### *nsy-5p::unc-62b*

A 1607 bp of *unc-62b* isoform coding region was amplified from worm cDNA using PCR and subcloned into a vector containing 5556 bp of *nsy-5* promoter (Chuang et al. 2007).

## Supplemental References

- Alqadah A, Hsieh YW, Chuang CF. 2016. Sox2 goes beyond stem cell biology. *Cell Cycle*. 15(6):777-778.
- Brenner S. 1974. The genetics of *caenorhabditis elegans*. *Genetics*. 77(1):71-94.
- Chuang CF, Vanhoven MK, Fetter RD, Verselis VK, Bargmann CI. 2007. An innexin-dependent cell network establishes left-right neuronal asymmetry in *c. Elegans*. *Cell*. 129(4):787-799.
- Cochella L, Tursun B, Hsieh YW, Galindo S, Johnston RJ, Chuang CF, Hobert O. 2014. Two distinct types of neuronal asymmetries are controlled by the *caenorhabditis elegans* zinc finger transcription factor *die-1*. *Genes Dev*. 28(1):34-43.
- Consortium CeDM. 2012. Large-scale screening for targeted knockouts in the *caenorhabditis elegans* genome. *G3 (Bethesda)*. 2(11):1415-1425.
- Jiang Y, Horner V, Liu J. 2005. The hmx homeodomain protein *mls-2* regulates cleavage orientation, cell proliferation and cell fate specification in the *c. Elegans* postembryonic mesoderm. *Development*. 132(18):4119-4130.
- Lanjuin A, VanHoven MK, Bargmann CI, Thompson JK, Sengupta P. 2003. *Otx/otd* homeobox genes specify distinct sensory neuron identities in *c. Elegans*. *Dev Cell*. 5(4):621-633.
- Sarin S, O'Meara MM, Flowers EB, Antonio C, Poole RJ, Didiano D, Johnston RJ, Jr., Chang S, Narula S, Hobert O. 2007. Genetic screens for *caenorhabditis elegans* mutants defective in left/right asymmetric neuronal fate specification. *Genetics*. 176(4):2109-2130.

- Troemel ER, Sagasti A, Bargmann CI. 1999. Lateral signaling mediated by axon contact and calcium entry regulates asymmetric odorant receptor expression in *c. Elegans*. *Cell*. 99(4):387-398.
- Van Auken K, Weaver D, Robertson B, Sundaram M, Saldi T, Edgar L, Elling U, Lee M, Boese Q, Wood WB. 2002. Roles of the homothorax/meis/prep homolog *unc-62* and the *exd/pbx* homologs *ceh-20* and *ceh-40* in *c. Elegans* embryogenesis. *Development*. 129(22):5255-5268.
- Van Nostrand EL, Sanchez-Blanco A, Wu B, Nguyen A, Kim SK. 2013. Roles of the developmental regulator *unc-62/homothorax* in limiting longevity in *caenorhabditis elegans*. *PLoS Genet*. 9(2):e1003325.
- Yang L, Sym M, Kenyon C. 2005. The roles of two *c. Elegans* *hox* co-factor orthologs in cell migration and vulva development. *Development*. 132(6):1413-1428.
- Yoshimura S, Murray JI, Lu Y, Waterston RH, Shaham S. 2008. *Mls-2* and *vab-3* control glia development, *hlh-17/olig* expression and glia-dependent neurite extension in *c. Elegans*. *Development*. 135(13):2263-2275.
