# Supplementary material
Source: publisher figshare collection journal article supplement (https://gsajournals.figshare.com/articles/dataset/_/14945463)
Supplement: Supplementary file 4 [file 1]

**A**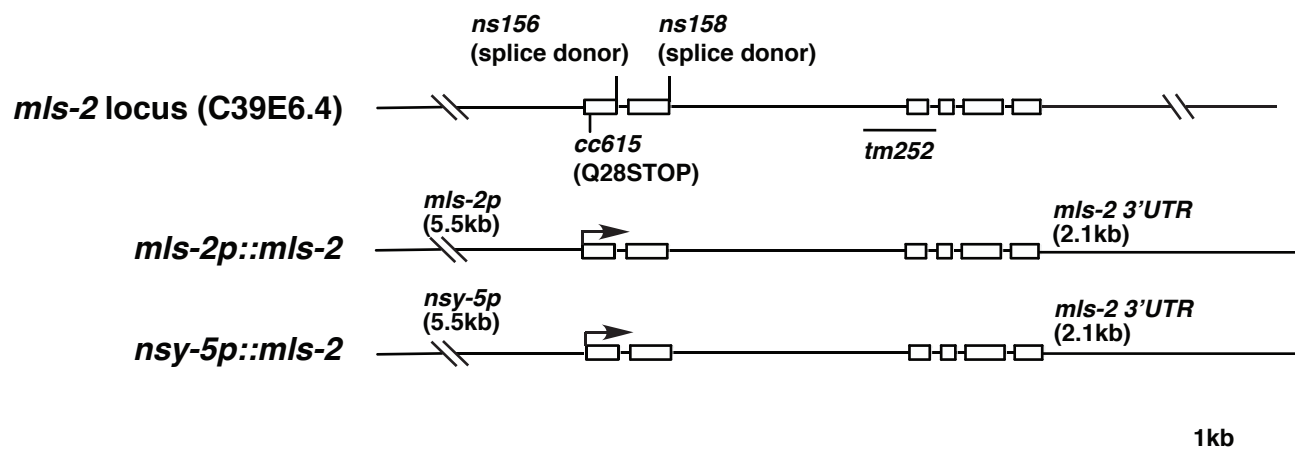**B**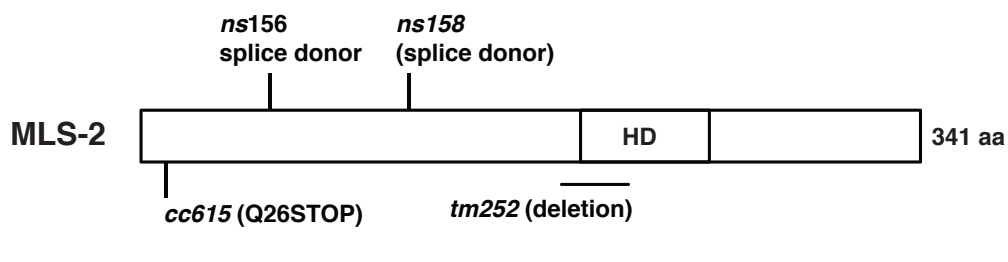

**Figure S1. Structure of *mls-2* gene and MLS-2 protein.**

(A) Structure of *mls-2* locus and transgenes.

(B) Domain structure of MLS-2 protein. HD, homeodomain.
